# Supplementary material for: Computational Exploration of Minimum Energy Reaction Pathway of N2O Formation from Intermediate I of P450nor Using an Active Center Model
Source: MDPI journal article supplement (doi:10.3390/ijms242417172), 2023-12-06
Supplement: s1 [file s1]

# Supplementary Materials

## Computational Exploration of Minimum Energy Reaction Pathway of N<sub>2</sub>O Formation from Intermediate *I* of P450nor Using an Active Center Model

Yusuke Kanematsu <sup>1,2,\*</sup>, Hiroko X. Kondo <sup>2,3</sup> and Yu Takano <sup>2,\*</sup>

<sup>1</sup> Graduate School of Advanced Science and Engineering, Hiroshima University, 1-4-1 Kagamiyama, Higashi-Hiroshima 739-8527, Japan

<sup>2</sup> Graduate School of Information Sciences, Hiroshima City University, 3-4-1 Ozukahigashi Asaminamiku, Hiroshima 731-3194, Japan; h\_kondo@mail.kitami-it.ac.jp

<sup>3</sup> Faculty of Engineering, Kitami Institute of Technology, 165 Koen-cho, Kitami 090-8507, Japan

\* Correspondence: ykanem@hiroshima-u.ac.jp (Y.K.); ytakano@hiroshima-cu.ac.jp (Y.T.);

Table S1. Relative potential energy ( $\Delta E$ , in kcal/mol) and hydride affinity ( $E_{\text{hyd}}$ , in kcal/mol) plotted for Fe-N-O bending angle.

| Isolated  |            |                  | ONIOM     |            |                  |
|-----------|------------|------------------|-----------|------------|------------------|
| A(Fe-N-O) | $\Delta E$ | $E_{\text{hyd}}$ | A(Fe-N-O) | $\Delta E$ | $E_{\text{hyd}}$ |
| 132.0     | 5.7        | -32.0            | 133.6     | 5.8        |                  |
| 137.0     | 3.6        | -28.6            | 138.6     | 3.6        |                  |
| 142.0     | 2.1        | -25.0            | 143.6     | 1.9        |                  |
| 147.0     | 1.1        | -20.8            | 148.6     | 0.8        | -22.4            |
| 152.0     | 0.4        | -16.3            | 153.6     | 0.2        | -17.4            |
| 157.0     | 0.1        | -11.8            | 158.6     | 0.0        | -11.9            |
| 162.0     | 0.0        | -6.8             | 163.6     | 0.2        | -5.8             |
| 167.0     | 0.1        | -2.4             | 168.6     | 0.9        | 0.8              |
| 172.0     | 0.2        | 3.3              | 173.6     | 1.9        |                  |
| 177.0     | 0.4        | 8.9              |           |            |                  |

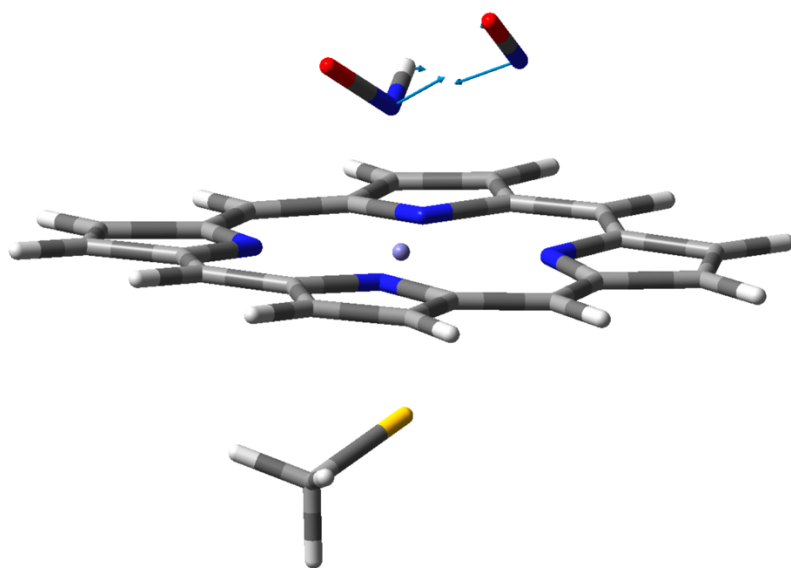

Figure S1. Imaginary frequency mode of TS **2** shown in blue arrows.

Table S2. Coordinates of the optimized geometries from the reactant (01) to the product (13).

|          |           |           |           |
|----------|-----------|-----------|-----------|
| 01.xyz   |           |           |           |
| Fe       | 0.036328  | -0.000233 | 0.169274  |
| C        | -3.373309 | -0.010844 | 0.719835  |
| C        | 0.041954  | -3.407326 | 0.204496  |
| C        | 3.396485  | 0.010351  | -0.523628 |
| C        | 0.021544  | 3.406822  | 0.209495  |
| N        | -1.398235 | -1.428439 | 0.402863  |
| C        | -2.735636 | -1.246507 | 0.622539  |
| C        | -3.399136 | -2.527239 | 0.758899  |
| C        | -2.434329 | -3.481357 | 0.624690  |
| C        | -1.185863 | -2.780171 | 0.401722  |
| N        | 1.455138  | -1.418611 | -0.082207 |
| C        | 1.260052  | -2.770123 | -0.028927 |
| C        | 2.506250  | -3.464562 | -0.284715 |
| C        | 3.448996  | -2.504724 | -0.506948 |
| C        | 2.776417  | -1.228248 | -0.377786 |
| N        | 1.446669  | 1.427070  | -0.080065 |
| C        | 2.769071  | 1.245039  | -0.375819 |
| C        | 3.434010  | 2.525718  | -0.502965 |
| C        | 2.485514  | 3.479562  | -0.279378 |
| C        | 1.243461  | 2.777300  | -0.024765 |
| N        | -1.406828 | 1.419028  | 0.404878  |
| C        | -1.202520 | 2.772046  | 0.405777  |
| C        | -2.455146 | 3.465408  | 0.629718  |
| C        | -3.414230 | 2.505332  | 0.762620  |
| C        | -2.743098 | 1.228808  | 0.624325  |
| H        | -4.450571 | -0.014229 | 0.898944  |
| H        | 0.049569  | -4.499510 | 0.222580  |
| H        | 4.462119  | 0.013694  | -0.762938 |
| H        | 0.022599  | 4.499004  | 0.229157  |
| H        | -4.466101 | -2.658530 | 0.937818  |
| H        | -2.539051 | -4.565307 | 0.667406  |
| H        | 2.622244  | -4.548145 | -0.297688 |
| H        | 4.506606  | -2.629839 | -0.738240 |
| H        | 4.490883  | 2.657517  | -0.733919 |
| H        | 2.595028  | 4.563838  | -0.290700 |
| H        | -2.566362 | 4.548647  | 0.674010  |
| H        | -4.481944 | 2.629992  | 0.941810  |
| N        | -0.305091 | 0.000735  | -1.692197 |
| O        | 0.461173  | 0.001322  | -2.674418 |
| S        | 0.293781  | -0.000093 | 2.493153  |
| C        | 2.074863  | -0.000370 | 2.887289  |
| H        | 2.581548  | 0.891981  | 2.488103  |
| H        | 2.184970  | 0.000783  | 3.984179  |
| H        | 2.580918  | -0.893939 | 2.490030  |
| H        | -1.320108 | 0.001308  | -1.975582 |
| N        | -2.387730 | 0.001911  | -3.561228 |
| O        | -1.565789 | 0.002295  | -4.381796 |
| 02ts.xyz |           |           |           |
| Fe       | -0.030167 | 0.097094  | -0.099474 |
| C        | 2.450116  | 2.490908  | -0.161856 |
| C        | 2.318016  | -2.336206 | -0.524836 |
| C        | -2.469182 | -2.285775 | 0.206163  |
| C        | -2.381001 | 2.555046  | 0.197775  |
| N        | 1.989150  | 0.085905  | -0.308053 |
| C        | 2.834583  | 1.161129  | -0.313020 |

|   |           |           |           |
|---|-----------|-----------|-----------|
| C | 4.199379  | 0.724296  | -0.525141 |
| C | 4.158309  | -0.631996 | -0.652056 |
| C | 2.770004  | -1.019451 | -0.505914 |
| N | -0.071062 | -1.915462 | -0.149079 |
| C | 0.998047  | -2.745092 | -0.339444 |
| C | 0.572163  | -4.129369 | -0.294120 |
| C | -0.771704 | -4.116174 | -0.064979 |
| C | -1.162832 | -2.724712 | 0.018159  |
| N | -2.043651 | 0.124106  | 0.107951  |
| C | -2.873229 | -0.952823 | 0.234286  |
| C | -4.243991 | -0.512997 | 0.392590  |
| C | -4.219441 | 0.850206  | 0.365863  |
| C | -2.832168 | 1.235889  | 0.202407  |
| N | 0.033106  | 2.131097  | 0.028928  |
| C | -1.051313 | 2.963601  | 0.124267  |
| C | -0.617068 | 4.344682  | 0.152112  |
| C | 0.744936  | 4.328295  | 0.068920  |
| C | 1.137022  | 2.937417  | -0.017639 |
| H | 3.237735  | 3.247041  | -0.187449 |
| H | 3.065222  | -3.118284 | -0.675968 |
| H | -3.242772 | -3.047562 | 0.324290  |
| H | -3.137474 | 3.338836  | 0.279299  |
| H | 5.063414  | 1.386758  | -0.571973 |
| H | 4.981990  | -1.325483 | -0.819753 |
| H | 1.233853  | -4.986888 | -0.414379 |
| H | -1.452969 | -4.960201 | 0.039985  |
| H | -5.100343 | -1.176490 | 0.510694  |
| H | -5.051073 | 1.548073  | 0.461420  |
| H | -1.283361 | 5.203972  | 0.225915  |
| H | 1.436003  | 5.170972  | 0.056737  |
| N | 0.023127  | 0.101028  | 1.907359  |
| O | -0.686195 | -0.630161 | 2.653716  |
| S | -0.231806 | 0.346538  | -2.402884 |
| C | -1.418046 | -0.897402 | -3.010219 |
| H | -2.414997 | -0.751866 | -2.566031 |
| H | -1.505368 | -0.789550 | -4.103701 |
| H | -1.082596 | -1.921534 | -2.786255 |
| H | 0.158709  | 1.055778  | 2.278236  |
| N | 1.904019  | -0.399067 | 2.506899  |
| O | 1.672302  | -1.278927 | 3.221713  |

03.xyz

|    |           |           |           |
|----|-----------|-----------|-----------|
| Fe | 0.001579  | 0.000556  | -0.131030 |
| C  | 3.446495  | 0.083650  | -0.419904 |
| C  | 0.098664  | -3.406426 | -0.122046 |
| C  | -3.401248 | -0.081383 | 0.263826  |
| C  | -0.064206 | 3.408015  | -0.104704 |
| N  | 1.492426  | -1.386379 | -0.222821 |
| C  | 2.837165  | -1.169493 | -0.366506 |
| C  | 3.541342  | -2.430661 | -0.454310 |
| C  | 2.596402  | -3.410264 | -0.370325 |
| C  | 1.318510  | -2.744939 | -0.230472 |
| N  | -1.387195 | -1.455198 | 0.012479  |
| C  | -1.150826 | -2.801064 | -0.002424 |
| C  | -2.394606 | -3.527775 | 0.150026  |
| C  | -3.380224 | -2.593398 | 0.267671  |
| C  | -2.735215 | -1.300402 | 0.183863  |
| N  | -1.455292 | 1.387608  | 0.014075  |
| C  | -2.794435 | 1.167893  | 0.185355  |
| C  | -3.500826 | 2.428138  | 0.273865  |

|   |           |           |           |
|---|-----------|-----------|-----------|
| C | -2.561111 | 3.409075  | 0.161026  |
| C | -1.283919 | 2.743054  | 0.006590  |
| N | 1.423909  | 1.457063  | -0.213530 |
| C | 1.185793  | 2.805673  | -0.212394 |
| C | 2.431086  | 3.531996  | -0.344708 |
| C | 3.421402  | 2.599030  | -0.433633 |
| C | 2.777648  | 1.305179  | -0.356101 |
| H | 4.532031  | 0.110303  | -0.533263 |
| H | 0.123377  | -4.498168 | -0.126823 |
| H | -4.483579 | -0.107507 | 0.405126  |
| H | -0.091375 | 4.499705  | -0.102774 |
| H | 4.620282  | -2.532956 | -0.566402 |
| H | 2.733208  | -4.490868 | -0.398422 |
| H | -2.479707 | -4.613850 | 0.172948  |
| H | -4.450032 | -2.745803 | 0.407052  |
| H | -4.576697 | 2.528364  | 0.413902  |
| H | -2.697868 | 4.489729  | 0.189289  |
| H | 2.516369  | 4.618061  | -0.365007 |
| H | 4.494470  | 2.753066  | -0.542905 |
| N | 1.215972  | -0.003609 | 2.533667  |
| O | 1.442497  | -0.003544 | 3.788660  |
| S | -0.041049 | -0.006487 | -2.416676 |
| C | -1.775778 | 0.004659  | -2.970739 |
| H | -2.303521 | 0.905917  | -2.624723 |
| H | -1.781156 | -0.004976 | -4.072541 |
| H | -2.319782 | -0.880762 | -2.609375 |
| H | 1.990457  | -0.007617 | 1.876445  |
| N | 0.051734  | -0.002145 | 1.935450  |
| O | -0.976782 | -0.001208 | 2.650352  |

# 03\_2W.xyz

|    |           |           |           |
|----|-----------|-----------|-----------|
| Fe | 0.487106  | -0.037628 | -0.280360 |
| C  | -2.101789 | -2.068565 | -1.338976 |
| C  | -1.416943 | 2.715592  | -0.966308 |
| C  | 2.979027  | 1.974727  | 0.937271  |
| C  | 2.359073  | -2.793870 | 0.405515  |
| N  | -1.409209 | 0.258388  | -0.985787 |
| C  | -2.300065 | -0.692293 | -1.420259 |
| C  | -3.476026 | -0.058314 | -1.970692 |
| C  | -3.278190 | 1.290524  | -1.869147 |
| C  | -1.982775 | 1.477026  | -1.256117 |
| N  | 0.734203  | 1.951600  | -0.049140 |
| C  | -0.163935 | 2.926393  | -0.394579 |
| C  | 0.371794  | 4.231923  | -0.073790 |
| C  | 1.604371  | 4.026368  | 0.472400  |
| C  | 1.820584  | 2.596472  | 0.478869  |
| N  | 2.331346  | -0.340505 | 0.466255  |
| C  | 3.210183  | 0.603666  | 0.920545  |
| C  | 4.420474  | -0.028027 | 1.402665  |
| C  | 4.248262  | -1.369532 | 1.240603  |
| C  | 2.931108  | -1.551415 | 0.664828  |
| N  | 0.167890  | -2.037144 | -0.401857 |
| C  | 1.074506  | -3.011464 | -0.084006 |
| C  | 0.510073  | -4.320654 | -0.335489 |
| C  | -0.748444 | -4.117695 | -0.817657 |
| C  | -0.947981 | -2.684869 | -0.861569 |
| H  | -2.906758 | -2.713440 | -1.696117 |
| H  | -2.009896 | 3.600606  | -1.204927 |
| H  | 3.768268  | 2.614178  | 1.337229  |
| H  | 2.965539  | -3.675942 | 0.620715  |

|   |           |           |           |
|---|-----------|-----------|-----------|
| H | -4.332991 | -0.589365 | -2.383225 |
| H | -3.939805 | 2.097956  | -2.180827 |
| H | -0.147844 | 5.174005  | -0.245069 |
| H | 2.315311  | 4.763260  | 0.844465  |
| H | 5.274735  | 0.504242  | 1.819486  |
| H | 4.930215  | -2.179781 | 1.496351  |
| H | 1.026905  | -5.263285 | -0.158513 |
| H | -1.488651 | -4.856299 | -1.123336 |
| N | -1.482123 | -0.025591 | 1.939879  |
| O | -2.069705 | -0.004164 | 3.097896  |
| S | 1.199969  | -0.027595 | -2.425822 |
| C | 2.745666  | 0.927768  | -2.533903 |
| H | 3.544858  | 0.476041  | -1.928225 |
| H | 3.061845  | 0.934525  | -3.589086 |
| H | 2.596485  | 1.967076  | -2.205366 |
| N | -0.203311 | -0.085176 | 1.728608  |
| O | 0.556602  | -0.136303 | 2.715674  |
| H | -2.019600 | 0.034065  | 1.080967  |
| O | -5.967339 | 0.508279  | 0.515712  |
| H | -5.545237 | 0.267010  | 1.364479  |
| H | -5.232575 | 0.576996  | -0.101214 |
| O | -4.688219 | -0.295295 | 2.902523  |
| H | -3.700682 | -0.145489 | 2.985920  |
| H | -4.800474 | -1.240206 | 3.027455  |

04ts.xyz

|    |           |           |           |
|----|-----------|-----------|-----------|
| Fe | 0.001989  | 0.018785  | -0.154133 |
| C  | 3.428374  | 0.219026  | -0.442779 |
| C  | 0.204761  | -3.387399 | -0.192744 |
| C  | -3.393292 | -0.185213 | 0.316517  |
| C  | -0.185545 | 3.421105  | -0.087528 |
| N  | 1.526451  | -1.318754 | -0.272299 |
| C  | 2.862277  | -1.051947 | -0.401537 |
| C  | 3.611304  | -2.285872 | -0.502720 |
| C  | 2.701416  | -3.300124 | -0.439471 |
| C  | 1.400265  | -2.681236 | -0.298280 |
| N  | -1.338603 | -1.487106 | 0.007992  |
| C  | -1.061211 | -2.825567 | -0.042779 |
| C  | -2.278318 | -3.593773 | 0.114200  |
| C  | -3.290625 | -2.693628 | 0.270708  |
| C  | -2.688885 | -1.379607 | 0.204187  |
| N  | -1.501532 | 1.352259  | 0.049356  |
| C  | -2.829805 | 1.084780  | 0.240774  |
| C  | -3.577566 | 2.318727  | 0.349102  |
| C  | -2.674813 | 3.332992  | 0.223989  |
| C  | -1.378538 | 2.714165  | 0.043205  |
| N  | 1.361949  | 1.521722  | -0.238636 |
| C  | 1.081658  | 2.859937  | -0.217563 |
| C  | 2.303725  | 3.628611  | -0.335533 |
| C  | 3.322483  | 2.728253  | -0.429365 |
| C  | 2.718608  | 1.413896  | -0.369264 |
| H  | 4.513109  | 0.283751  | -0.549274 |
| H  | 0.266080  | -4.477440 | -0.217924 |
| H  | -4.471717 | -0.249196 | 0.474670  |
| H  | -0.248979 | 4.511232  | -0.075481 |
| H  | 4.694003  | -2.348011 | -0.608645 |
| H  | 2.876162  | -4.374894 | -0.481038 |
| H  | -2.329328 | -4.682263 | 0.113428  |
| H  | -4.352556 | -2.882996 | 0.424579  |
| H  | -4.653704 | 2.380446  | 0.508324  |

|   |           |           |           |
|---|-----------|-----------|-----------|
| H | -2.849345 | 4.408026  | 0.259237  |
| H | 2.354131  | 4.717070  | -0.338738 |
| H | 4.391267  | 2.916272  | -0.527094 |
| N | 1.326432  | 0.023106  | 2.456752  |
| O | 1.443237  | -0.227458 | 3.868911  |
| S | -0.094860 | 0.053980  | -2.425498 |
| C | -1.831173 | -0.122429 | -2.944954 |
| H | -2.453545 | 0.695749  | -2.553226 |
| H | -1.859842 | -0.090631 | -4.045944 |
| H | -2.256389 | -1.080056 | -2.609559 |
| H | 2.010392  | -0.788206 | 2.835673  |
| N | 0.134549  | -0.020090 | 1.935686  |
| O | -0.868115 | -0.032178 | 2.666775  |

# 04ts\_2W.xyz

|    |           |           |           |
|----|-----------|-----------|-----------|
| Fe | -0.380899 | 0.064718  | -0.342188 |
| C  | 2.273634  | 1.922225  | -1.506902 |
| C  | 1.262891  | -2.802073 | -1.182486 |
| C  | -2.984059 | -1.786355 | 0.917220  |
| C  | -1.988133 | 2.934958  | 0.554763  |
| N  | 1.426538  | -0.351121 | -1.161009 |
| C  | 2.351840  | 0.539635  | -1.634867 |
| C  | 3.441852  | -0.161759 | -2.273404 |
| C  | 3.160744  | -1.493182 | -2.173583 |
| C  | 1.895296  | -1.598724 | -1.479779 |
| N  | -0.778461 | -1.905805 | -0.149297 |
| C  | 0.025762  | -2.936824 | -0.557880 |
| C  | -0.598733 | -4.205071 | -0.254482 |
| C  | -1.793082 | -3.921437 | 0.341109  |
| C  | -1.895014 | -2.480861 | 0.398216  |
| N  | -2.160712 | 0.486953  | 0.511906  |
| C  | -3.099764 | -0.402022 | 0.960893  |
| C  | -4.233824 | 0.303863  | 1.516769  |
| C  | -3.955378 | 1.633268  | 1.407343  |
| C  | -2.650780 | 1.733066  | 0.786451  |
| N  | 0.088230  | 2.034474  | -0.398943 |
| C  | -0.716058 | 3.065906  | 0.005681  |
| C  | -0.062967 | 4.333877  | -0.237830 |
| C  | 1.140004  | 4.050308  | -0.813232 |
| C  | 1.218290  | 2.610217  | -0.918889 |
| H  | 3.104704  | 2.511129  | -1.898131 |
| H  | 1.778454  | -3.720499 | -1.470197 |
| H  | -3.809879 | -2.374871 | 1.321554  |
| H  | -2.507916 | 3.853682  | 0.834019  |
| H  | 4.308560  | 0.319975  | -2.723788 |
| H  | 3.743255  | -2.340512 | -2.533851 |
| H  | -0.161635 | -5.178902 | -0.472855 |
| H  | -2.547289 | -4.612283 | 0.716472  |
| H  | -5.114024 | -0.175533 | 1.943913  |
| H  | -4.556966 | 2.484083  | 1.725696  |
| H  | -0.488733 | 5.306884  | 0.005430  |
| H  | 1.916605  | 4.738712  | -1.144484 |
| N  | 1.642189  | -0.137436 | 2.025082  |
| O  | 1.961991  | -0.314517 | 3.341503  |
| S  | -1.203951 | 0.182743  | -2.431116 |
| C  | -2.856532 | -0.579108 | -2.465921 |
| H  | -3.571269 | -0.027600 | -1.838039 |
| H  | -3.207608 | -0.553888 | -3.509926 |
| H  | -2.823864 | -1.626134 | -2.130952 |
| N  | 0.398252  | -0.070821 | 1.718458  |

|   |           |           |          |
|---|-----------|-----------|----------|
| O | -0.435193 | -0.166688 | 2.636138 |
| H | 2.514427  | -0.040711 | 1.354042 |
| O | 3.966784  | 0.083536  | 0.998267 |
| H | 4.379069  | -0.227758 | 2.119376 |
| H | 4.244600  | -0.560929 | 0.344026 |
| O | 4.519605  | -0.501540 | 3.266550 |
| H | 2.990169  | -0.390850 | 3.366000 |
| H | 4.942239  | 0.249981  | 3.688250 |

05.xyz

|    |           |           |           |
|----|-----------|-----------|-----------|
| Fe | 0.011497  | -0.000066 | -0.152263 |
| C  | 3.442021  | 0.069196  | -0.427505 |
| C  | 0.085952  | -3.409627 | -0.152261 |
| C  | -3.391625 | -0.068455 | 0.294538  |
| C  | -0.050256 | 3.410231  | -0.136428 |
| N  | 1.483126  | -1.393822 | -0.258615 |
| C  | 2.827507  | -1.178673 | -0.378035 |
| C  | 3.531917  | -2.440832 | -0.458987 |
| C  | 2.585058  | -3.419326 | -0.388986 |
| C  | 1.306795  | -2.749526 | -0.264419 |
| N  | -1.385742 | -1.451321 | 0.017757  |
| C  | -1.158472 | -2.799179 | -0.013486 |
| C  | -2.404462 | -3.519072 | 0.147153  |
| C  | -3.383069 | -2.579266 | 0.284471  |
| C  | -2.731389 | -1.289869 | 0.203669  |
| N  | -1.442745 | 1.393986  | 0.020349  |
| C  | -2.780791 | 1.178299  | 0.207041  |
| C  | -3.483499 | 2.440294  | 0.293970  |
| C  | -2.543326 | 3.418968  | 0.160853  |
| C  | -1.269649 | 2.749837  | -0.003451 |
| N  | 1.426177  | 1.452093  | -0.249050 |
| C  | 1.196034  | 2.799709  | -0.248891 |
| C  | 2.446705  | 3.520292  | -0.369812 |
| C  | 3.431754  | 2.580604  | -0.444346 |
| C  | 2.778285  | 1.291016  | -0.369772 |
| H  | 4.529151  | 0.091312  | -0.528902 |
| H  | 0.106756  | -4.501532 | -0.162588 |
| H  | -4.472807 | -0.090366 | 0.445525  |
| H  | -0.072932 | 4.502134  | -0.141286 |
| H  | 4.612458  | -2.543917 | -0.556196 |
| H  | 2.719283  | -4.500514 | -0.414724 |
| H  | -2.496397 | -4.604899 | 0.160601  |
| H  | -4.452423 | -2.726158 | 0.433889  |
| H  | -4.557706 | 2.543575  | 0.445101  |
| H  | -2.678311 | 4.500196  | 0.180062  |
| H  | 2.537818  | 4.606075  | -0.390512 |
| H  | 4.507302  | 2.727145  | -0.541097 |
| N  | 1.293969  | 0.002714  | 2.416164  |
| O  | 1.261158  | 0.001298  | 3.860085  |
| S  | -0.073895 | -0.006796 | -2.435899 |
| C  | -1.818586 | 0.012765  | -2.958242 |
| H  | -2.335350 | 0.916673  | -2.602804 |
| H  | -1.844231 | 0.002811  | -4.059907 |
| H  | -2.360394 | -0.869603 | -2.586397 |
| H  | 2.207030  | 0.005386  | 4.033564  |
| N  | 0.122871  | -0.002692 | 1.946042  |
| O  | -0.917517 | -0.008655 | 2.653402  |

05\_2W.xyz

|    |           |          |           |
|----|-----------|----------|-----------|
| Fe | -0.413637 | 0.078083 | -0.306101 |
|----|-----------|----------|-----------|

|          |           |           |           |
|----------|-----------|-----------|-----------|
| C        | 1.442251  | 2.900564  | -0.987527 |
| C        | 2.054047  | -1.862993 | -1.633014 |
| C        | -2.149873 | -2.739958 | 0.608343  |
| C        | -2.930584 | 2.025153  | 0.896118  |
| N        | 1.403192  | 0.452695  | -1.135119 |
| C        | 1.978267  | 1.672168  | -1.368479 |
| C        | 3.225062  | 1.507904  | -2.081989 |
| C        | 3.386759  | 0.164114  | -2.280106 |
| C        | 2.240393  | -0.483437 | -1.679392 |
| N        | -0.106258 | -1.911212 | -0.464193 |
| C        | 0.974799  | -2.517184 | -1.046524 |
| C        | 0.846445  | -3.956212 | -0.958931 |
| C        | -0.326686 | -4.205602 | -0.309946 |
| C        | -0.916696 | -2.918076 | -0.013943 |
| N        | -2.214471 | -0.293138 | 0.528372  |
| C        | -2.754932 | -1.508727 | 0.840583  |
| C        | -4.054785 | -1.337266 | 1.457033  |
| C        | -4.281320 | 0.004675  | 1.513695  |
| C        | -3.113833 | 0.647115  | 0.943845  |
| N        | -0.666824 | 2.071767  | -0.052192 |
| C        | -1.784307 | 2.677340  | 0.449549  |
| C        | -1.612587 | 4.115392  | 0.456047  |
| C        | -0.373073 | 4.363511  | -0.053720 |
| C        | 0.203820  | 3.076132  | -0.378534 |
| H        | 2.025263  | 3.795641  | -1.212780 |
| H        | 2.831202  | -2.486057 | -2.080345 |
| H        | -2.691710 | -3.635680 | 0.918419  |
| H        | -3.743800 | 2.649443  | 1.271997  |
| H        | 3.874847  | 2.324721  | -2.394467 |
| H        | 4.196264  | -0.355027 | -2.792755 |
| H        | 1.576162  | -4.668406 | -1.342973 |
| H        | -0.769414 | -5.166179 | -0.048311 |
| H        | -4.690954 | -2.151862 | 1.801832  |
| H        | -5.143862 | 0.533138  | 1.918672  |
| H        | -2.356564 | 4.827002  | 0.813001  |
| H        | 0.120765  | 5.322209  | -0.209321 |
| N        | 1.596557  | -0.332519 | 1.825866  |
| O        | 1.915519  | -0.477931 | 3.208075  |
| S        | -1.307925 | 0.251996  | -2.390001 |
| C        | -2.475379 | -1.122802 | -2.643682 |
| H        | -3.301348 | -1.090799 | -1.918027 |
| H        | -2.893109 | -1.027720 | -3.658713 |
| H        | -1.971304 | -2.097407 | -2.562071 |
| N        | 0.381352  | -0.000556 | 1.668407  |
| O        | -0.396081 | 0.189382  | 2.634287  |
| H        | 3.165667  | 0.316917  | 1.128994  |
| O        | 4.116332  | 0.561634  | 1.017999  |
| H        | 4.796907  | -0.428391 | 2.320434  |
| H        | 4.265698  | 0.536295  | 0.067401  |
| O        | 4.900714  | -0.916496 | 3.166246  |
| H        | 2.829354  | -0.802916 | 3.168609  |
| H        | 5.047830  | -0.229831 | 3.821612  |
| 06ts.xyz |           |           |           |
| Fe       | 0.012976  | 0.005951  | -0.156468 |
| C        | 3.441823  | -0.047945 | -0.426342 |
| C        | -0.034775 | -3.406670 | -0.150293 |
| C        | -3.391009 | 0.056550  | 0.295100  |
| C        | 0.071213  | 3.414994  | -0.144439 |
| N        | 1.432180  | -1.440730 | -0.254822 |

|   |           |           |           |
|---|-----------|-----------|-----------|
| C | 2.783836  | -1.272633 | -0.372959 |
| C | 3.443550  | -2.558468 | -0.450989 |
| C | 2.463014  | -3.503437 | -0.382048 |
| C | 1.208639  | -2.789531 | -0.260127 |
| N | -1.435183 | -1.396536 | 0.017310  |
| C | -1.257025 | -2.752005 | -0.013627 |
| C | -2.527859 | -3.426779 | 0.147537  |
| C | -3.472079 | -2.452247 | 0.285057  |
| C | -2.774741 | -1.187226 | 0.203919  |
| N | -1.390899 | 1.449459  | 0.023342  |
| C | -2.736121 | 1.281219  | 0.207706  |
| C | -3.393674 | 2.567298  | 0.291302  |
| C | -2.419368 | 3.512051  | 0.156518  |
| C | -1.170156 | 2.798663  | -0.005664 |
| N | 1.476078  | 1.405407  | -0.258496 |
| C | 1.294456  | 2.760289  | -0.259762 |
| C | 2.570229  | 3.435870  | -0.380428 |
| C | 3.520905  | 2.461803  | -0.451312 |
| C | 2.821555  | 1.196503  | -0.375434 |
| H | 4.529313  | -0.064655 | -0.523275 |
| H | -0.052564 | -4.498662 | -0.161003 |
| H | -4.472479 | 0.073388  | 0.444744  |
| H | 0.087402  | 4.506949  | -0.151278 |
| H | 4.519992  | -2.699062 | -0.545925 |
| H | 2.559577  | -4.588682 | -0.407466 |
| H | -2.658909 | -4.508613 | 0.160696  |
| H | -4.546009 | -2.560650 | 0.434697  |
| H | -4.463757 | 2.708928  | 0.440566  |
| H | -2.516391 | 4.597371  | 0.172424  |
| H | 2.700015  | 4.517650  | -0.400564 |
| H | 4.601357  | 2.569247  | -0.543305 |
| N | 1.314865  | -0.021794 | 2.418633  |
| O | 1.316070  | 0.026701  | 3.877508  |
| S | -0.077199 | 0.027060  | -2.434982 |
| C | -1.819881 | -0.058218 | -2.957549 |
| H | -2.397801 | 0.796398  | -2.575456 |
| H | -1.845174 | -0.035452 | -4.059004 |
| H | -2.298682 | -0.987263 | -2.613973 |
| H | 1.480842  | -0.890476 | 4.122444  |
| N | 0.131832  | 0.003419  | 1.956041  |
| O | -0.911848 | 0.010902  | 2.645308  |

06ts\_2W.xyz

|    |           |           |           |
|----|-----------|-----------|-----------|
| Fe | -0.396925 | 0.067146  | -0.324758 |
| C  | 2.041629  | 2.238138  | -1.416562 |
| C  | 1.520952  | -2.578307 | -1.307315 |
| C  | -2.801897 | -2.095798 | 0.824677  |
| C  | -2.265848 | 2.713493  | 0.740591  |
| N  | 1.433233  | -0.125890 | -1.183948 |
| C  | 2.264894  | 0.876090  | -1.603275 |
| C  | 3.433632  | 0.318428  | -2.247659 |
| C  | 3.291374  | -1.040789 | -2.203471 |
| C  | 2.031888  | -1.303548 | -1.541447 |
| N  | -0.605040 | -1.941196 | -0.255189 |
| C  | 0.298131  | -2.865226 | -0.707179 |
| C  | -0.198430 | -4.204481 | -0.472235 |
| C  | -1.415101 | -4.069729 | 0.128486  |
| C  | -1.656283 | -2.649281 | 0.260259  |
| N  | -2.199208 | 0.266112  | 0.567633  |
| C  | -3.044756 | -0.733995 | 0.963265  |

|   |           |           |           |
|---|-----------|-----------|-----------|
| C | -4.234964 | -0.174157 | 1.567989  |
| C | -4.084463 | 1.179922  | 1.540366  |
| C | -2.802685 | 1.441255  | 0.917571  |
| N | -0.136554 | 2.077149  | -0.302275 |
| C | -1.027162 | 2.999405  | 0.172745  |
| C | -0.507279 | 4.338723  | -0.010761 |
| C | 0.705852  | 4.206201  | -0.617101 |
| C | 0.923310  | 2.786806  | -0.798873 |
| H | 2.804720  | 2.927574  | -1.782472 |
| H | 2.129976  | -3.425957 | -1.627997 |
| H | -3.565103 | -2.784483 | 1.192316  |
| H | -2.867105 | 3.560176  | 1.078150  |
| H | 4.246176  | 0.904203  | -2.676222 |
| H | 3.961232  | -1.807365 | -2.592082 |
| H | 0.333468  | -5.118250 | -0.735630 |
| H | -2.097979 | -4.848952 | 0.465605  |
| H | -5.062299 | -0.759843 | 1.967504  |
| H | -4.761266 | 1.948558  | 1.912466  |
| H | -1.021486 | 5.250350  | 0.292162  |
| H | 1.405341  | 4.984441  | -0.920528 |
| N | 1.574504  | 0.426756  | 1.863401  |
| O | 1.941677  | 0.359100  | 3.253619  |
| S | -1.274707 | 0.230584  | -2.414007 |
| C | -2.785724 | -0.780742 | -2.506559 |
| H | -3.553649 | -0.427509 | -1.802584 |
| H | -3.181914 | -0.699797 | -3.531442 |
| H | -2.573816 | -1.839014 | -2.294002 |
| N | 0.421965  | -0.081397 | 1.643477  |
| O | -0.262899 | -0.634940 | 2.524731  |
| H | 3.268776  | 0.454697  | 1.153335  |
| O | 4.230806  | 0.282906  | 1.013677  |
| H | 4.530143  | -0.781593 | 2.433042  |
| H | 4.281473  | -0.065408 | 0.117416  |
| O | 4.538049  | -1.242096 | 3.300011  |
| H | 2.503392  | -0.429454 | 3.327562  |
| H | 4.809501  | -0.562481 | 3.922135  |

07.xyz

|    |           |           |           |
|----|-----------|-----------|-----------|
| Fe | 0.023201  | 0.000215  | -0.156380 |
| C  | 3.458270  | 0.068842  | -0.371675 |
| C  | 0.096580  | -3.408395 | -0.157088 |
| C  | -3.387329 | -0.067622 | 0.246889  |
| C  | -0.038484 | 3.409569  | -0.142852 |
| N  | 1.495910  | -1.392779 | -0.238476 |
| C  | 2.842339  | -1.178325 | -0.333914 |
| C  | 3.547154  | -2.440730 | -0.403770 |
| C  | 2.599011  | -3.418635 | -0.352152 |
| C  | 1.318989  | -2.748578 | -0.248756 |
| N  | -1.378020 | -1.450173 | -0.005531 |
| C  | -1.149881 | -2.798102 | -0.035470 |
| C  | -2.397539 | -3.518112 | 0.107522  |
| C  | -3.378286 | -2.578612 | 0.233716  |
| C  | -2.726273 | -1.289163 | 0.163073  |
| N  | -1.434371 | 1.393786  | -0.003563 |
| C  | -2.775149 | 1.178990  | 0.165730  |
| C  | -3.477847 | 2.441299  | 0.241645  |
| C  | -2.535233 | 3.419378  | 0.119260  |
| C  | -1.260045 | 2.749686  | -0.026811 |
| N  | 1.439455  | 1.451130  | -0.229825 |
| C  | 1.209159  | 2.798924  | -0.234601 |

|   |           |           |           |
|---|-----------|-----------|-----------|
| C | 2.461803  | 3.519296  | -0.334512 |
| C | 3.447830  | 2.579813  | -0.390307 |
| C | 2.793537  | 1.290245  | -0.326406 |
| H | 4.547079  | 0.090702  | -0.449980 |
| H | 0.117486  | -4.500243 | -0.168213 |
| H | -4.470369 | -0.089271 | 0.383990  |
| H | -0.060814 | 4.501427  | -0.149006 |
| H | 4.629292  | -2.543868 | -0.479082 |
| H | 2.733289  | -4.499807 | -0.375166 |
| H | -2.489418 | -4.603951 | 0.117953  |
| H | -4.449468 | -2.726169 | 0.368696  |
| H | -4.553928 | 2.545606  | 0.378041  |
| H | -2.669885 | 4.500682  | 0.134789  |
| H | 2.553316  | 4.605020  | -0.352918 |
| H | 4.525024  | 2.725997  | -0.465245 |
| N | 1.269391  | -0.000396 | 2.482170  |
| O | 1.139935  | -0.001798 | 3.868432  |
| S | -0.027217 | -0.006226 | -2.428678 |
| C | -1.763432 | 0.009973  | -2.977118 |
| H | -2.286995 | 0.912944  | -2.629754 |
| H | -1.770131 | 0.000176  | -4.078930 |
| H | -2.308574 | -0.873855 | -2.614091 |
| H | 0.147403  | -0.004321 | 3.956127  |
| N | 0.130297  | -0.002437 | 1.922242  |
| O | -0.931278 | -0.005626 | 2.657066  |

# 07\_2W.xyz

|    |           |           |           |
|----|-----------|-----------|-----------|
| Fe | -0.421056 | -0.056898 | -0.313273 |
| C  | 2.724075  | -0.872867 | -1.458803 |
| C  | -1.094890 | -3.362828 | 0.172451  |
| C  | -3.476880 | 0.769404  | 1.021651  |
| C  | 0.291176  | 3.253048  | -0.734071 |
| N  | 0.616611  | -1.777505 | -0.591452 |
| C  | 1.883444  | -1.917895 | -1.087341 |
| C  | 2.237567  | -3.319379 | -1.169139 |
| C  | 1.159949  | -4.019319 | -0.714153 |
| C  | 0.152936  | -3.042504 | -0.355283 |
| N  | -1.986057 | -1.088755 | 0.439125  |
| C  | -2.077767 | -2.449923 | 0.547128  |
| C  | -3.349088 | -2.818783 | 1.132115  |
| C  | -4.017391 | -1.656169 | 1.380396  |
| C  | -3.153363 | -0.581575 | 0.943487  |
| N  | -1.417037 | 1.667279  | 0.040788  |
| C  | -2.659819 | 1.811448  | 0.595594  |
| C  | -3.009855 | 3.212331  | 0.682562  |
| C  | -1.952284 | 3.909745  | 0.178297  |
| C  | -0.959544 | 2.931355  | -0.212811 |
| N  | 1.196175  | 0.981737  | -0.966994 |
| C  | 1.288258  | 2.342611  | -1.074667 |
| C  | 2.593431  | 2.715705  | -1.579238 |
| C  | 3.282323  | 1.553960  | -1.776785 |
| C  | 2.394153  | 0.477850  | -1.394115 |
| H  | 3.718931  | -1.129993 | -1.826229 |
| H  | -1.318342 | -4.422041 | 0.315852  |
| H  | -4.446399 | 1.031394  | 1.449944  |
| H  | 0.516191  | 4.312718  | -0.871409 |
| H  | 3.193952  | -3.696811 | -1.529343 |
| H  | 1.040680  | -5.097976 | -0.617312 |
| H  | -3.667891 | -3.842214 | 1.327807  |
| H  | -5.003422 | -1.518806 | 1.823195  |

|   |           |           |           |
|---|-----------|-----------|-----------|
| H | -3.945660 | 3.594062  | 1.089681  |
| H | -1.831502 | 4.988401  | 0.082399  |
| H | 2.921729  | 3.739545  | -1.755910 |
| H | 4.298168  | 1.417174  | -2.145085 |
| N | 1.564151  | -0.166277 | 1.831974  |
| O | 1.915041  | 0.069948  | 3.176532  |
| S | -1.152994 | -0.225395 | -2.439253 |
| C | -2.916062 | 0.223504  | -2.504707 |
| H | -3.079276 | 1.265947  | -2.194475 |
| H | -3.251272 | 0.109051  | -3.547869 |
| H | -3.523056 | -0.434549 | -1.865867 |
| N | 0.335168  | 0.083963  | 1.644925  |
| O | -0.381737 | 0.473801  | 2.637807  |
| H | 4.416370  | -1.294641 | 1.079201  |
| O | 5.279162  | -0.906651 | 1.257233  |
| H | 3.784718  | 1.854571  | 1.419816  |
| H | 5.053131  | -0.044847 | 1.648105  |
| O | 4.168404  | 1.596464  | 2.264632  |
| H | 1.034236  | 0.375035  | 3.536211  |
| H | 3.431816  | 1.149749  | 2.720817  |

08ts.xyz

|    |           |           |           |
|----|-----------|-----------|-----------|
| Fe | 0.032322  | 0.043085  | -0.203432 |
| C  | 3.466436  | 0.373499  | -0.339640 |
| C  | 0.357357  | -3.334693 | -0.389150 |
| C  | -3.376620 | -0.304046 | 0.175026  |
| C  | -0.285467 | 3.416211  | -0.045869 |
| N  | 1.610961  | -1.223680 | -0.338242 |
| C  | 2.941852  | -0.914332 | -0.383860 |
| C  | 3.734554  | -2.120426 | -0.496356 |
| C  | 2.855271  | -3.161146 | -0.523591 |
| C  | 1.529673  | -2.586437 | -0.421801 |
| N  | -1.266868 | -1.506153 | -0.149657 |
| C  | -0.932161 | -2.829362 | -0.249201 |
| C  | -2.117765 | -3.653272 | -0.147052 |
| C  | -3.170178 | -2.804388 | 0.029571  |
| C  | -2.623968 | -1.464819 | 0.025608  |
| N  | -1.534202 | 1.300590  | -0.010923 |
| C  | -2.856589 | 0.986534  | 0.150064  |
| C  | -3.645570 | 2.191955  | 0.285405  |
| C  | -2.773750 | 3.237166  | 0.203372  |
| C  | -1.455333 | 2.665454  | 0.028335  |
| N  | 1.342725  | 1.584882  | -0.194641 |
| C  | 1.006244  | 2.908798  | -0.141244 |
| C  | 2.199337  | 3.729820  | -0.170906 |
| C  | 3.258826  | 2.875482  | -0.238945 |
| C  | 2.707389  | 1.536763  | -0.257357 |
| H  | 4.552254  | 0.479594  | -0.382979 |
| H  | 0.459805  | -4.420027 | -0.453078 |
| H  | -4.453991 | -0.413421 | 0.314785  |
| H  | -0.390061 | 4.502546  | -0.003056 |
| H  | 4.822903  | -2.145955 | -0.542335 |
| H  | 3.064555  | -4.228130 | -0.594238 |
| H  | -2.121392 | -4.742023 | -0.189939 |
| H  | -4.225071 | -3.044530 | 0.159346  |
| H  | -4.725428 | 2.214617  | 0.429571  |
| H  | -2.982973 | 4.304626  | 0.268652  |
| H  | 2.203952  | 4.818881  | -0.133686 |
| H  | 4.322624  | 3.109090  | -0.272289 |
| N  | 0.414297  | -1.234402 | 3.265450  |

|   |           |           |           |
|---|-----------|-----------|-----------|
| O | 0.402222  | -0.389868 | 4.409634  |
| S | 0.001087  | 0.156724  | -2.441663 |
| C | -1.716964 | 0.005282  | -3.019948 |
| H | -2.352401 | 0.808675  | -2.620840 |
| H | -1.689919 | 0.089413  | -4.118576 |
| H | -2.153882 | -0.967364 | -2.751801 |
| H | 0.270520  | 0.491604  | 3.980294  |
| N | 0.259754  | -0.584948 | 2.202051  |
| O | 0.115108  | 0.719408  | 2.266991  |

09.xyz

|    |           |           |           |
|----|-----------|-----------|-----------|
| Fe | 0.011514  | 0.000110  | -0.193105 |
| C  | 3.441657  | 0.081811  | -0.412347 |
| C  | 0.089164  | -3.405805 | -0.220074 |
| C  | -3.400022 | -0.081695 | 0.274085  |
| C  | -0.071420 | 3.406191  | -0.196701 |
| N  | 1.484223  | -1.385758 | -0.289699 |
| C  | 2.829967  | -1.167822 | -0.379867 |
| C  | 3.538014  | -2.428678 | -0.456668 |
| C  | 2.591564  | -3.408397 | -0.417032 |
| C  | 1.309504  | -2.741452 | -0.310314 |
| N  | -1.392425 | -1.456354 | -0.032611 |
| C  | -1.158715 | -2.803018 | -0.076739 |
| C  | -2.400309 | -3.529936 | 0.086723  |
| C  | -3.382271 | -2.596200 | 0.244343  |
| C  | -2.737175 | -1.302433 | 0.167352  |
| N  | -1.459505 | 1.387587  | -0.025488 |
| C  | -2.795476 | 1.169238  | 0.174604  |
| C  | -3.500774 | 2.430579  | 0.260882  |
| C  | -2.564039 | 3.410640  | 0.109601  |
| C  | -1.289711 | 2.744032  | -0.059371 |
| N  | 1.417244  | 1.454788  | -0.278140 |
| C  | 1.178923  | 2.800770  | -0.289626 |
| C  | 2.428257  | 3.527912  | -0.391723 |
| C  | 3.419725  | 2.594100  | -0.438079 |
| C  | 2.771851  | 1.300791  | -0.369974 |
| H  | 4.530617  | 0.107826  | -0.486756 |
| H  | 0.114610  | -4.497454 | -0.240694 |
| H  | -4.479485 | -0.107671 | 0.437306  |
| H  | -0.097577 | 4.497948  | -0.209549 |
| H  | 4.620577  | -2.529379 | -0.528583 |
| H  | 2.728279  | -4.489073 | -0.447352 |
| H  | -2.487920 | -4.616170 | 0.090325  |
| H  | -4.449548 | -2.750584 | 0.401405  |
| H  | -4.573955 | 2.533323  | 0.420000  |
| H  | -2.702633 | 4.491494  | 0.121306  |
| H  | 2.514016  | 4.614005  | -0.414876 |
| H  | 4.496308  | 2.746134  | -0.509584 |
| N  | 1.242989  | 0.007595  | 2.417904  |
| O  | 0.059226  | -0.002040 | 1.783784  |
| S  | -0.067202 | -0.006506 | -2.467557 |
| C  | -1.810485 | 0.024252  | -2.995807 |
| H  | -2.320996 | 0.937103  | -2.654408 |
| H  | -1.828226 | 0.003370  | -4.097415 |
| H  | -2.362826 | -0.849888 | -2.620211 |
| N  | 1.186998  | -0.000469 | 3.663403  |
| O  | -0.125905 | -0.019180 | 4.197238  |
| H  | -0.677988 | -0.020962 | 3.385357  |

10ts.xyz

|    |           |           |           |
|----|-----------|-----------|-----------|
| Fe | -0.024685 | 0.093886  | -0.172097 |
| C  | 3.317518  | 0.862105  | -0.419141 |
| C  | 0.707302  | -3.213062 | -0.544703 |
| C  | -3.334172 | -0.699435 | 0.361252  |
| C  | -0.759934 | 3.400637  | 0.183388  |
| N  | 1.682648  | -0.962802 | -0.421731 |
| C  | 2.958762  | -0.478942 | -0.506335 |
| C  | 3.892376  | -1.563469 | -0.723885 |
| C  | 3.154085  | -2.707505 | -0.775087 |
| C  | 1.772448  | -2.318154 | -0.582144 |
| N  | -1.109737 | -1.616525 | -0.117431 |
| C  | -0.625535 | -2.882050 | -0.314313 |
| C  | -1.697792 | -3.847673 | -0.209862 |
| C  | -2.833566 | -3.144138 | 0.065368  |
| C  | -2.453168 | -1.749654 | 0.118607  |
| N  | -1.724674 | 1.141790  | 0.175763  |
| C  | -2.985424 | 0.648899  | 0.378500  |
| C  | -3.915382 | 1.733553  | 0.607125  |
| C  | -3.191064 | 2.887586  | 0.538369  |
| C  | -1.820501 | 2.502779  | 0.277544  |
| N  | 1.071809  | 1.794437  | -0.122724 |
| C  | 0.578852  | 3.063161  | 0.006579  |
| C  | 1.660401  | 4.025831  | -0.038485 |
| C  | 2.811011  | 3.312005  | -0.192811 |
| C  | 2.426937  | 1.917375  | -0.247498 |
| H  | 4.378222  | 1.106423  | -0.503278 |
| H  | 0.941014  | -4.271154 | -0.678496 |
| H  | -4.381158 | -0.951548 | 0.541374  |
| H  | -0.996575 | 4.462194  | 0.282146  |
| H  | 4.971287  | -1.443878 | -0.817019 |
| H  | 3.495085  | -3.732440 | -0.917559 |
| H  | -1.574786 | -4.924747 | -0.318981 |
| H  | -3.844129 | -3.518632 | 0.225835  |
| H  | -4.980892 | 1.608561  | 0.798225  |
| H  | -3.534097 | 3.914244  | 0.663995  |
| H  | 1.534690  | 5.104725  | 0.048468  |
| H  | 3.835428  | 3.676647  | -0.261389 |
| N  | 1.379399  | 0.086248  | 2.544950  |
| O  | 0.133100  | -0.072682 | 1.843041  |
| S  | -0.194042 | 0.322230  | -2.406535 |
| C  | -1.885935 | -0.118470 | -2.917933 |
| H  | -2.634541 | 0.536360  | -2.448260 |
| H  | -1.944176 | 0.007700  | -4.010925 |
| H  | -2.124103 | -1.163433 | -2.671116 |
| N  | 1.468166  | -0.833337 | 3.401941  |
| O  | 0.452263  | -1.685157 | 3.411046  |
| H  | -0.114277 | -1.001974 | 2.400776  |

11.xyz

|    |           |           |           |
|----|-----------|-----------|-----------|
| Fe | -0.051817 | 0.095161  | -0.174966 |
| C  | 3.153550  | 1.302539  | -0.457188 |
| C  | 1.108691  | -3.083238 | -0.578873 |
| C  | -3.216394 | -1.135761 | 0.409648  |
| C  | -1.216846 | 3.272869  | 0.212198  |
| N  | 1.776153  | -0.723875 | -0.453215 |
| C  | 2.975008  | -0.073394 | -0.551877 |
| C  | 4.041305  | -1.022031 | -0.792529 |
| C  | 3.461628  | -2.253939 | -0.843070 |
| C  | 2.043738  | -2.053923 | -0.626375 |
| N  | -0.896443 | -1.744739 | -0.106969 |

|   |           |           |           |
|---|-----------|-----------|-----------|
| C | -0.251652 | -2.933939 | -0.322564 |
| C | -1.183631 | -4.033932 | -0.208416 |
| C | -2.398280 | -3.489869 | 0.090682  |
| C | -2.206873 | -2.057730 | 0.148445  |
| N | -1.869867 | 0.904865  | 0.209981  |
| C | -3.050928 | 0.247146  | 0.427269  |
| C | -4.114412 | 1.196996  | 0.670781  |
| C | -3.552325 | 2.437889  | 0.595577  |
| C | -2.146262 | 2.240938  | 0.316406  |
| N | 0.807985  | 1.925724  | -0.124616 |
| C | 0.152532  | 3.117405  | 0.017994  |
| C | 1.095926  | 4.215332  | -0.033103 |
| C | 2.329148  | 3.661488  | -0.204974 |
| C | 2.133173  | 2.228647  | -0.264942 |
| H | 4.171106  | 1.686064  | -0.552948 |
| H | 1.479041  | -4.099922 | -0.724254 |
| H | -4.217450 | -1.526267 | 0.603359  |
| H | -1.592080 | 4.292966  | 0.318260  |
| H | 5.093084  | -0.758921 | -0.899298 |
| H | 3.934182  | -3.223342 | -0.997808 |
| H | -0.919964 | -5.084308 | -0.327555 |
| H | -3.346693 | -3.997045 | 0.265322  |
| H | -5.150994 | 0.930259  | 0.874991  |
| H | -4.028460 | 3.409095  | 0.728043  |
| H | 0.829244  | 5.267476  | 0.062669  |
| H | 3.295202  | 4.159199  | -0.282668 |
| N | 1.455543  | 0.253624  | 2.560305  |
| O | 0.170265  | -0.042728 | 1.855868  |
| S | -0.287077 | 0.312922  | -2.399270 |
| C | -1.901788 | -0.371131 | -2.890278 |
| H | -2.731396 | 0.162956  | -2.404144 |
| H | -1.994540 | -0.247973 | -3.981193 |
| H | -1.977807 | -1.441589 | -2.648693 |
| N | 1.716063  | -0.690905 | 3.343536  |
| O | 0.906079  | -1.706973 | 3.387594  |
| H | 0.029337  | -0.958997 | 2.263620  |

# 12ts.xyz

|    |           |           |           |
|----|-----------|-----------|-----------|
| Fe | -0.057583 | 0.108866  | -0.174216 |
| C  | 2.999261  | 1.662883  | -0.430513 |
| C  | 1.438503  | -2.913539 | -0.655463 |
| C  | -3.078327 | -1.468493 | 0.339262  |
| C  | -1.554271 | 3.130462  | 0.308657  |
| N  | 1.848287  | -0.499310 | -0.480241 |
| C  | 2.969000  | 0.278662  | -0.563579 |
| C  | 4.131556  | -0.543664 | -0.824444 |
| C  | 3.688756  | -1.829917 | -0.899165 |
| C  | 2.257370  | -1.788480 | -0.679192 |
| N  | -0.702693 | -1.811185 | -0.169404 |
| C  | 0.068530  | -2.917931 | -0.406685 |
| C  | -0.740466 | -4.114652 | -0.330441 |
| C  | -2.009603 | -3.712413 | -0.034020 |
| C  | -1.973960 | -2.269686 | 0.062423  |
| N  | -1.954424 | 0.708051  | 0.221237  |
| C  | -3.060651 | -0.077091 | 0.404370  |
| C  | -4.219565 | 0.746891  | 0.671374  |
| C  | -3.790238 | 2.041609  | 0.645404  |
| C  | -2.369590 | 2.003112  | 0.371452  |
| N  | 0.602877  | 2.020946  | -0.072540 |
| C  | -0.176227 | 3.129419  | 0.111107  |

|   |           |           |           |
|---|-----------|-----------|-----------|
| C | 0.643341  | 4.323939  | 0.093562  |
| C | 1.928023  | 3.912150  | -0.100549 |
| C | 1.886721  | 2.468780  | -0.206544 |
| H | 3.969202  | 2.156318  | -0.518068 |
| H | 1.916825  | -3.880992 | -0.820621 |
| H | -4.033317 | -1.969245 | 0.510762  |
| H | -2.036252 | 4.100496  | 0.448244  |
| H | 5.148309  | -0.165725 | -0.926474 |
| H | 4.263037  | -2.739100 | -1.074201 |
| H | -0.363972 | -5.127065 | -0.472966 |
| H | -2.899494 | -4.322972 | 0.115859  |
| H | -5.223598 | 0.365890  | 0.856157  |
| H | -4.366506 | 2.952253  | 0.807084  |
| H | 0.265514  | 5.337755  | 0.223396  |
| H | 2.834018  | 4.513828  | -0.166196 |
| N | 1.640006  | 0.084676  | 2.616752  |
| O | 0.177137  | -0.014897 | 1.822223  |
| S | -0.308846 | 0.367099  | -2.402644 |
| C | -1.858287 | -0.436557 | -2.922891 |
| H | -2.734837 | 0.030222  | -2.449376 |
| H | -1.943681 | -0.317418 | -4.014895 |
| H | -1.856730 | -1.510651 | -2.685634 |
| N | 1.729681  | -0.860255 | 3.377975  |
| O | 0.869859  | -1.798149 | 3.523226  |
| H | -0.101199 | -0.876697 | 2.194024  |

### 13.xyz

|    |           |           |           |
|----|-----------|-----------|-----------|
| Fe | 0.136594  | 0.003082  | -0.188280 |
| C  | -3.171926 | 0.095234  | -1.132057 |
| C  | 0.223053  | 3.406860  | -0.161549 |
| C  | 3.412073  | -0.088909 | 0.887136  |
| C  | 0.053440  | -3.399991 | -0.229135 |
| N  | -1.218349 | 1.465290  | -0.582729 |
| C  | -2.523705 | 1.314989  | -0.948574 |
| C  | -3.147301 | 2.612395  | -1.126868 |
| C  | -2.187472 | 3.542710  | -0.860912 |
| C  | -0.983909 | 2.808302  | -0.517373 |
| N  | 1.556427  | 1.386157  | 0.259357  |
| C  | 1.393157  | 2.742421  | 0.203150  |
| C  | 2.616638  | 3.407935  | 0.602890  |
| C  | 3.514077  | 2.426879  | 0.909193  |
| C  | 2.836299  | 1.165567  | 0.689317  |
| N  | 1.486457  | -1.456911 | 0.228897  |
| C  | 2.775285  | -1.309021 | 0.662684  |
| C  | 3.389412  | -2.606715 | 0.856689  |
| C  | 2.444053  | -3.535514 | 0.532205  |
| C  | 1.255401  | -2.801987 | 0.146752  |
| N  | -1.289457 | -1.381326 | -0.610250 |
| C  | -1.122334 | -2.735444 | -0.571868 |
| C  | -2.360912 | -3.401802 | -0.929397 |
| C  | -3.272768 | -2.419561 | -1.176890 |
| C  | -2.585266 | -1.158744 | -0.973015 |
| H  | -4.222842 | 0.124186  | -1.427914 |
| H  | 0.252252  | 4.498964  | -0.156415 |
| H  | 4.446519  | -0.118073 | 1.236599  |
| H  | 0.028259  | -4.492096 | -0.245197 |
| H  | -4.185885 | 2.768812  | -1.417827 |
| H  | -2.267417 | 4.629478  | -0.884946 |
| H  | 2.751649  | 4.488772  | 0.643028  |
| H  | 4.543525  | 2.528993  | 1.252402  |

|   |           |           |           |
|---|-----------|-----------|-----------|
| H | 4.412416  | -2.766974 | 1.196925  |
| H | 2.524675  | -4.622346 | 0.551137  |
| H | -2.495313 | -4.482488 | -0.974856 |
| H | -4.317595 | -2.517853 | -1.470913 |
| N | -3.366210 | -0.010976 | 2.727489  |
| O | -0.448200 | -0.000684 | 1.605573  |
| S | 0.679201  | 0.008133  | -2.458505 |
| C | 2.495340  | -0.016342 | -2.626469 |
| H | 2.934027  | -0.916414 | -2.168257 |
| H | 2.745263  | -0.017513 | -3.700181 |
| H | 2.959047  | 0.869119  | -2.164386 |
| N | -2.558802 | -0.024103 | 3.502770  |
| O | -1.733001 | -0.038498 | 4.357691  |
| H | 0.336100  | -0.013850 | 2.161850  |
